RESEARCH ARTICLE

# The relationship between platelet count and postoperative acute kidney injury and long-term prognosis in neurosurgical critically ill patients: A retrospective study

Shu Yang<sup>1,2</sup>, Shuo Zhang<sup>3</sup>, Guoqing Li<sup>1</sup>, Guowei Zhu<sup>1,2</sup>, Linfeng Fang<sup>1,2</sup>, Minmin Zhu<sup>2\*</sup>

**1** Wuxi School of Medicine, Jiangnan University, Wuxi, China, **2** Department of Anesthesiology and Pain Medicine, Wuxi No.2 People's Hospital (Jiangnan University Medical Center), Wuxi, China, **3** The Second Hospital of Tianjin Medical University, Tianjin, China

\* [mmzhummzhu@163.com](mailto:mmzhummzhu@163.com)

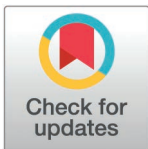

**OPEN ACCESS**

**Citation:** Yang S, Zhang S, Li G, Zhu G, Fang L, Zhu M (2026) The relationship between platelet count and postoperative acute kidney injury and long-term prognosis in neurosurgical critically ill patients: A retrospective study. PLoS One 21(2): e0343653. <https://doi.org/10.1371/journal.pone.0343653>

**Editor:** Siddharth Gosavi, Sai Gosavi Specialty Clinic / Nano Hospitals Bangalore / Saraswati Specialty Clinic, INDIA

**Received:** September 11, 2025

**Accepted:** February 9, 2026

**Published:** February 27, 2026

**Copyright:** © 2026 Yang et al. This is an open access article distributed under the terms of the [Creative Commons Attribution License](https://creativecommons.org/licenses/by/4.0/), which permits unrestricted use, distribution, and reproduction in any medium, provided the original author and source are credited.

**Data availability statement:** The data were obtained from the MIMIC-IV database. Access requests can be made through the PhysioNet website: <https://physionet.org/content/mimiciv/3.1/>.

## Abstract

### Objective

This study was designed to investigate the associations among platelet (PLT) count upon admission to the intensive care unit (ICU), postoperative acute kidney injury (AKI), and long-term prognosis (one-year mortality risk) in patients undergoing neurosurgical operations.

### Methods

This study conducted a retrospective analysis based on the MIMIC-IV database, including patients who underwent neurosurgery and were admitted to the ICU. Platelet count information at admission was collected. The primary endpoint were AKI within 7 days of ICU admission and mortality within one year after surgery. For the primary endpoint, a multivariate logistic regression model combined with restricted cubic spline was used for statistical analysis to explore the potential association between platelet count and AKI, and subgroup analysis was conducted to assess the stability of the results. For the other endpoint, a restricted cubic spline was used to construct a visualization relationship graph, and a Cox multivariate regression model was further established and a cumulative mortality curve was drawn. Sensitivity analyses were performed using both the first recorded platelet count following ICU admission and the 24-hour mean platelet count to assess the robustness of our findings. Additionally, an independent validation cohort was constructed using the MIMIC-III database to conduct external validation.

### Results

A total of 1605 patients were included in this study, with a median age of 60 years, among whom 875 were male (54.5%). Among the 1605 patients, 607 (37.82%)

**Funding:** This research was supported by the Hospital Management Innovation Research Project of Jiangsu Hospital Association (JSYGY-3-2024-123 to M.Z.) and the Wuxi Municipal Health Commission's Science and Technology Achievements and Appropriate Technology Promotion Project (T202325 to M.Z.). There was no additional external funding received for this study. The funders had no role in study design, data collection and analysis, decision to publish, or preparation of the manuscript.

**Competing interests:** The authors have declared that no competing interests exist.

developed acute kidney injury within 7 days of hospitalization. Logistic regression analysis showed that compared with patients in the first quartile of platelet count ( $Q1 \leq 179$ ), those in the third quartile ( $Q3 > 234$ ) had a significantly lower risk of developing acute kidney injury within 7 days of hospitalization (Model 1: HR = 0.42, 95% CI: 0.33–0.54; Model 2: HR = 0.67, 95% CI: 0.59–0.76; Model 3: HR = 0.57, 95% CI: 0.43–0.74; Model 4: HR = 0.62, 95% CI: 0.47–0.82; all P-values < 0.050). Furthermore, when the platelet count is below  $204 \times 10^9/L$ , the risk of AKI occurrence in patients increases significantly. Cox multivariate regression analysis of the secondary endpoint showed that both relatively low platelet count ( $\leq 179$ ) and relatively high platelet count ( $> 234$ ) were associated with an increased risk of death within 1 year, with the former association being particularly significant (HR = 1.53, 95% CI: 1.17–2, P = 0.002). Sensitivity analyses yielded directionally consistent results. In the MIMIC-III external validation cohort, the associations between platelet levels and risks of AKI as well as long-term mortality remained generally consistent.

## Conclusion

In neurosurgical patients admitted to the ICU, early platelet levels within the first 24 hours were associated with the incidence of AKI within 7 days and long-term outcomes. A lower platelet count during the early ICU period was associated with an increased risk of AKI and poorer prognosis. This association appeared to be non-linear, the range of  $179\text{--}234 \times 10^9/L$  corresponded to a lower risk or better prognosis. Platelet count can be a potential tool for risk stratification, but it is not sufficient to support clinical intervention decisions based on causal relationships.

## 1. Introduction

Neurosurgical operations, including intracranial tumor resection, aneurysm clipping, or treatment of traumatic brain injury (TBI), are frequently accompanied by a substantial risk of perioperative hemorrhage and hemodynamic instability. This situation is prone to triggering a series of postoperative complications [1,2]. Among these complications, acute kidney injury (AKI) is highly prevalent. It is often induced by ischemia, inflammation, or exposure to nephrotoxic drugs. AKI affects 67% of patients in the intensive care unit (ICU) and is directly associated with an in-hospital mortality rate of 40–50% [3–5].

Although existing research has delved deeply into the roles of intraoperative blood loss, hypotension, and nephrotoxic drugs in the development of AKI, the relationship between postoperative platelet (PLT) abnormalities and AKI remains ambiguous [6,7]. Particularly for neurosurgical patients, surgical trauma, the need for blood transfusion, and coagulation disorders commonly result in alterations in both the quantity and function of platelets. These changes may, in turn, impact renal function through mechanisms such as microcirculation disturbances and inflammatory responses [1].

Platelets are not only involved in the hemostatic process but also play a pivotal role in inflammatory responses and endothelial function [8]. Thrombocytopenia can exacerbate ischemia-reperfusion injury. Moreover, abnormal platelet function or a low platelet count may lead to the formation of microthrombi in renal tubules and an enhancement of oxidative stress, thus promoting kidney injury [9,10]. Clinical studies have shown that among critically ill patients suffering from infectious endocarditis, the platelet count can independently predict the risk of mortality within 28 days [11]. Moreover, existing research on sepsis indicates that there exists a crucial threshold for platelet count ( $176 \times 10^9/L$ ) in affected patients. Mortality risk increases when the platelet count is either below or above this threshold [12].

Neurosurgical patients present with clinical features such as surgical bleeding and the use of mannitol, all of which can cause changes in platelet quantity or function. However, the association between these factors and AKI lacks substantial large-scale evidence. Although dynamic changes in platelet counts among ICU patients have been shown to be associated with short-term adverse events, there is still a lack of direct evidence regarding whether they independently influence the risk of AKI and long-term survival rates in the neurosurgical postoperative population [9,13].

Most existing AKI prediction models incorporate parameters such as serum creatinine and urine output. However, platelets, as a readily available parameter in routine ICU tests, have not had their prognostic value fully exploited [14,15]. More significantly, there is currently no consensus on the intervention threshold for platelet abnormalities. For example, it remains unclear whether platelet transfusion is necessary to prevent AKI and improve the prognosis of high-risk individuals. This lack of consensus poses challenges to clinical decision-making, especially for neurosurgical patients who are at risk of both bleeding and AKI. Therefore, investigating the correlation between platelet levels upon ICU admission and AKI, as well as long-term prognosis, in neurosurgical patients is of great significance for optimizing risk stratification and enhancing clinical outcomes.

This study is designed to assess the relationship between platelet concentrations and the likelihood of developing AKI within seven days among neurosurgical patients during their ICU stay. Simultaneously, it aims to elucidate the relationship between platelet levels and the 1-year mortality rate in this patient group and identify the possible optimal platelet range for such patients.

## 2. Materials and methods

### 2.1. Data origin

The dataset utilized in this research was obtained from the MIMIC-IV database (version 3.1). All personally identifiable information related to patients in the database has been removed to ensure confidentiality. As a result, the study was granted exemption from requiring ethical review and informed consent. The first author of this paper, SY, had complete access to the MIMIC-IV database and conducted the retrieval of pertinent data (access credential ID: 62274870). The data were accessed for research purposes on 25 May 2024. The original data collection from source institutions (e.g., Beth Israel Deaconess Medical Center) was approved by their respective Institutional Review Boards (IRBs) with waived informed consent due to the retrospective and anonymized nature of the data. In the MIMIC-IV database, patients' private information is encrypted. According to national legislation and institutional requirements, this study does not require ethical approval or informed consent.

### 2.2. Study population

Inclusion criteria: Patients who were first admitted to the intensive care unit (ICU) after neurosurgical procedures. Exclusion criteria: (1) Patients aged less than 18 years old; (2) Patients with an ICU length of stay less than 24 hours; (3) Patients lacking platelet data within 24 hours of admission; (4) Patients with a history of chronic kidney disease. AKI was defined in accordance with the Kidney Disease: Improving Global Outcomes (KDIGO) criteria, incorporating both serum creatinine levels and urine output measurements. Creatinine-based staging was determined using measured serum creatinine values: baseline creatinine was defined as the lowest serum creatinine level within the 7 days prior to admission,

while the 48-hour criterion was assessed using the lowest serum creatinine level within the 48 hours prior to admission. Urine output-based staging was defined based on KDIGO thresholds: <0.5 mL/kg/h for 6 consecutive hours, <0.3 mL/kg/h for 12 consecutive hours, or anuria for 12 consecutive hours. The final AKI stage at each time point was determined as the highest stage derived from creatinine-based and urine output-based staging. And AKI events were assessed within the first 7 days following ICU admission. As presented in Fig 1, after the application of these criteria, a total of 1,605 patients were enrolled in this study.

### 2.3. Data extraction

The research collected and evaluated the following information: (1) Patient demographics, including age, gender, ethnicity, duration of hospitalization, and ICU admission period; (2) Physiological parameters such as heart rate, systolic and diastolic blood pressure (SBP,DBP), mean arterial pressure (MAP), respiratory rate, body temperature, and blood oxygen saturation (SpO<sub>2</sub>); (3) Laboratory test results encompassing hematocrit, hemoglobin levels, platelet count, white blood cell count (WBC), blood urea nitrogen (BUN), creatinine concentration, anion gap, sodium, potassium, calcium, chloride, bicarbonate, international normalized ratio (INR), prothrombin time (PT), and partial thromboplastin time (PTT); (4) Existing comorbid conditions, such as myocardial infarction, congestive heart failure, peripheral vascular disease, dementia, cerebrovascular disorders, chronic obstructive pulmonary disease (COPD), rheumatologic diseases, peptic ulcer, mild to severe liver dysfunction, diabetes with and without complications, paraplegia, malignancies, metastatic cancers, and AIDS; (5) Clinical severity scores, including the Charlson Comorbidity Index, Acute Physiology Score III (APSOIII), Simplified Acute Physiology Score II (SAPSII), and Oxford Acute Severity of Illness Score (OASIS); Additionally, recorded interventions included the use of mechanical ventilation and continuous renal replacement therapy (CRRT). We also extracted data on mannitol administration, blood transfusion exposure, perioperative hypotension (early ICU 24h hypotension as a proxy for perioperative hypotension), and antiplatelet medication use within 24 hours after patients were admitted to the ICU postoperatively. The lowest platelet count selected within the first 24 hours after admission to the ICU was chosen

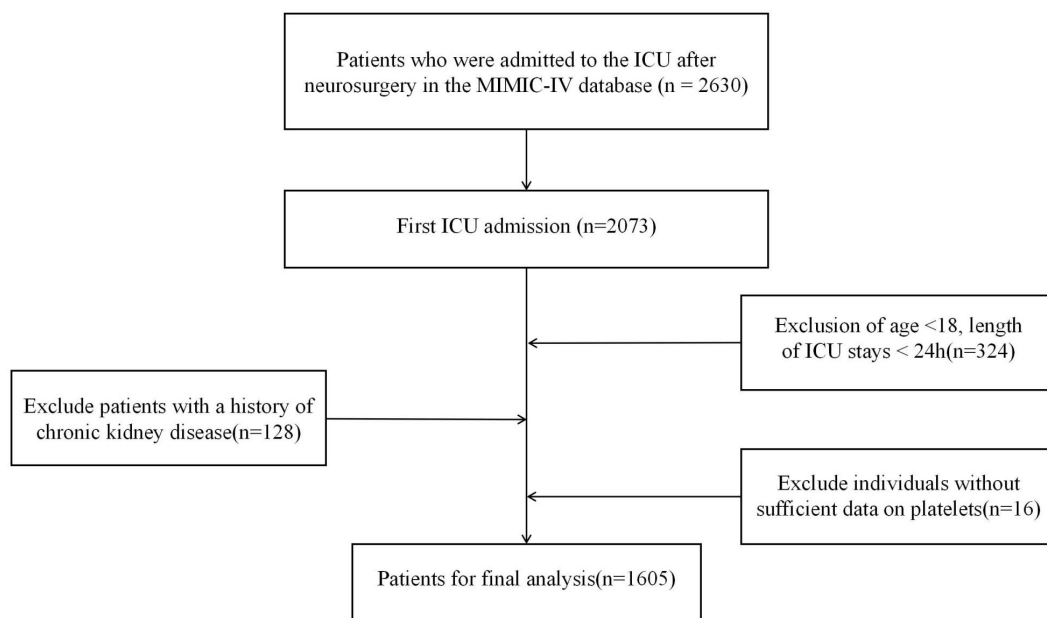

**Fig 1. Flow diagram of inclusion and exclusion of the study population.**

<https://doi.org/10.1371/journal.pone.0343653.g001>

as the main exposure factor, as it is considered a sensitive marker of early platelet consumption and systemic stress in critically ill patients. Studies have shown that the lowest platelet count is more closely associated with organ dysfunction and adverse outcomes [16].

## 2.4. Research outcomes

The primary endpoints of this study were the incidence of acute kidney injury within 7 days after admission to the ICU and the one-year mortality rate.

## 2.5. Statistical analysis

Patients were categorized into three groups according to the tertiles of their platelet counts: the Q1 group ( $PLT \leq 179$ ,  $n = 524$ ), the Q2 group ( $179 < PLT \leq 234$ ,  $n = 541$ ), and the Q3 group ( $PLT > 234$ ,  $n = 540$ ). In accordance with clinical significance and relevant literature, we conducted our analysis using the minimum platelet count measured within 24 hours of a patient's initial ICU admission. The missing values for all study variables were less than 10%. For these missing values, we employed multiple imputation for data filling. Baseline features were described using descriptive statistics, expressed as  $n$  (%). Intergroup differences were assessed through chi-square tests or Fisher's exact tests. Continuous variables with a normal distribution were presented as mean  $\pm$  standard deviation, and group comparisons were conducted using independent sample t-tests. For variables that did not follow a normal distribution, results were reported as median (interquartile range: Q1, Q3), and differences were analyzed using the Wilcoxon rank-sum test. The occurrence of acute kidney injury was evaluated via univariate and multivariate logistic regression analyses. To assess prognosis, multivariate Cox regression models were employed, and Kaplan-Meier survival curves were constructed to compare survival rates among patients with varying platelet levels. Furthermore, restricted cubic spline (RCS) techniques were applied to explore the association between platelet levels and the two studied outcomes, and forest plots were utilized to investigate potential interactions. To assess the robustness of our findings, we conducted sensitivity analyses by replacing the primary exposure variable (minimum platelet count within the first 24 hours of ICU admission) with the first measured platelet count post-ICU admission and the mean platelet count during this period. All analyses employed the same multivariate logistic/Cox regression model with restricted cubic splines incorporated. The statistical analysis was performed with R software and Free Statistics software. A p-value below 0.05 was regarded as statistically significant.

## 3. Results

### 3.1. Analysis of the Incidence of AKI

**3.1.1. Population baseline.** In comparison to patients with normal kidney function (NKD), those with AKI exhibited a greater male predominance, were of more advanced age, and demonstrated elevated heart rate, systolic blood pressure, respiratory rate, and SpO<sub>2</sub> levels. Additionally, AKI patients showed higher levels of blood glucose, albumin, BUN, serum creatinine, sodium, INR, PT, and PTT. They also presented with greater disease severity and experienced longer durations of hospitalization and ICU admission. Furthermore, baseline platelet counts were notably lower in AKI patients when compared to their NKD counterparts ( $P < 0.001$ , [Table 1](#)).

**3.1.2. Univariate logistic regression analysis and correlational analysis.** As shown in [Table 2](#), univariate logistic regression analysis revealed a positive association between the incidence of acute kidney injury (AKI) and factors such as gender, age, heart rate, SBP, body temperature, respiratory rate, BUN, serum creatinine levels, and several scoring systems. Conversely, a negative association was observed with variables such as DBP, MAP, hematocrit, hemoglobin concentration, anion gap, bicarbonate levels, as well as serum calcium, chloride, and potassium concentrations. The heatmap from the correlation analysis ([Fig 2](#)) further indicates a notable relationship between platelet counts and the occurrence of AKI (correlation coefficient:  $-0.176$ ,  $P < 0.001$ ).

**Table 1. Baseline characteristics of patients in the NKD group and AKI group.**

| Variables                                 | Total<br>(n=1605)    | NKD<br>(n=998)       | AKI<br>(n=607)       | p-value |
|-------------------------------------------|----------------------|----------------------|----------------------|---------|
| <b>Characteristics</b>                    |                      |                      |                      |         |
| Gender, n (%)                             |                      |                      |                      | < 0.001 |
| Female                                    | 730 (45.5)           | 490 (49.1)           | 240 (39.5)           |         |
| Male                                      | 875 (54.5)           | 508 (50.9)           | 367 (60.5)           |         |
| Age (years), n (%)                        |                      |                      |                      | < 0.001 |
| <65                                       | 990 (61.7)           | 654 (65.5)           | 336 (55.4)           |         |
| >=65                                      | 615 (38.3)           | 344 (34.5)           | 271 (44.6)           |         |
| race, n (%)                               |                      |                      |                      | 0.028   |
| White                                     | 1071 (66.7)          | 690 (69.1)           | 381 (62.8)           |         |
| African American                          | 131 (8.2)            | 77 (7.7)             | 54 (8.9)             |         |
| Asain                                     | 61 (3.8)             | 40 (4)               | 21 (3.5)             |         |
| Other                                     | 342 (21.3)           | 191 (19.1)           | 151 (24.9)           |         |
| Heart rate (beats/min), Mean ± SD         | 81.4 ± 13.9          | 80.2 ± 13.5          | 83.5 ± 14.3          | < 0.001 |
| SBP (mmHg), Mean ± SD                     | 124.5 ± 11.5         | 124.1 ± 11.2         | 125.3 ± 12.0         | 0.038   |
| DBP (mmHg), Mean ± SD                     | 65.1 ± 9.0           | 65.7 ± 8.7           | 64.1 ± 9.4           | < 0.001 |
| MBP (mmHg), Mean ± SD                     | 83.7 ± 8.2           | 84.1 ± 8.0           | 83.0 ± 8.6           | 0.009   |
| Respiratory rate (time/min), Mean ± SD    | 17.5 ± 2.9           | 17.1 ± 2.7           | 18.2 ± 3.1           | < 0.001 |
| Temperature (°C), Mean ± SD               | 37.0 ± 0.4           | 36.9 ± 0.4           | 37.0 ± 0.5           | < 0.001 |
| SpO2 (%), Mean ± SD                       | 97.5 ± 1.7           | 97.2 ± 1.7           | 97.8 ± 1.7           | < 0.001 |
| <b>Laboratory</b>                         |                      |                      |                      |         |
| Glucose (mg/dL), Median (IQR)             | 142.3 (127.0, 163.5) | 140.6 (125.0, 158.1) | 147.0 (130.8, 172.9) | < 0.001 |
| Hematocrit (%), Mean ± SD                 | 33.8 ± 5.7           | 34.6 ± 5.1           | 32.4 ± 6.2           | < 0.001 |
| Hemoglobin (g/L), Mean ± SD               | 11.3 ± 2.0           | 11.6 ± 1.8           | 10.8 ± 2.1           | < 0.001 |
| Platelets (10 <sup>9</sup> /L), Mean ± SD | 214.3 ± 80.9         | 225.4 ± 78.2         | 196.0 ± 82.0         | < 0.001 |
| WBC (10 <sup>9</sup> /L), Median (IQR)    | 14.2 (11.2, 17.7)    | 14.1 (11.1, 17.4)    | 14.4 (11.2, 18.2)    | 0.181   |
| Aniongap (mmol/L), Mean ± SD              | 12.9 ± 2.9           | 13.0 ± 2.8           | 12.7 ± 3.1           | 0.087   |
| Bicarbonate (mmol/L), Mean ± SD           | 22.1 ± 3.1           | 22.4 ± 3.0           | 21.8 ± 3.3           | < 0.001 |
| BUN (mg/dL), Mean ± SD                    | 16.1 ± 7.3           | 15.2 ± 6.3           | 17.7 ± 8.4           | < 0.001 |
| Calcium (mg/dL), Mean ± SD                | 8.3 ± 0.7            | 8.4 ± 0.6            | 8.2 ± 0.8            | < 0.001 |
| Chloride (mmol/L), Mean ± SD              | 104.0 ± 4.8          | 104.3 ± 4.3          | 103.5 ± 5.5          | 0.002   |
| Creatinine (mEq/L), Mean ± SD             | 0.9 ± 0.3            | 0.8 ± 0.3            | 1.0 ± 0.4            | < 0.001 |
| Sodium (mmol/L), Mean ± SD                | 141.1 ± 4.3          | 140.7 ± 3.8          | 141.7 ± 4.8          | < 0.001 |
| Potassium (mmol/L), Mean ± SD             | 3.8 ± 0.4            | 3.9 ± 0.4            | 3.7 ± 0.5            | < 0.001 |
| INR, Mean ± SD                            | 1.2 ± 0.4            | 1.2 ± 0.3            | 1.3 ± 0.6            | < 0.001 |
| PT(seconds), Mean ± SD                    | 13.5 ± 5.6           | 12.8 ± 2.7           | 14.6 ± 8.3           | < 0.001 |
| PTT (seconds), Mean ± SD                  | 28.8 ± 12.5          | 27.7 ± 10.6          | 30.5 ± 14.9          | < 0.001 |
| <b>Comorbidities</b>                      |                      |                      |                      |         |
| Myocardial infarct, n (%)                 | 66 (4.1)             | 25 (2.5)             | 41 (6.8)             | < 0.001 |
| Congestive heart failure, n (%)           | 69 (4.3)             | 24 (2.4)             | 45 (7.4)             | < 0.001 |
| Peripheral vascula disease, n (%)         | 50 (3.1)             | 29 (2.9)             | 21 (3.5)             | 0.536   |
| dementia, n (%)                           | 26 (1.6)             | 11 (1.1)             | 15 (2.5)             | 0.035   |
| Cerebrovascular disease, n (%)            | 395 (24.6)           | 200 (20)             | 195 (32.1)           | < 0.001 |
| Chronic pulmonary disease, n (%)          | 181 (11.3)           | 106 (10.6)           | 75 (12.4)            | 0.287   |
| Rheumatic disease, n (%)                  | 30 (1.9)             | 15 (1.5)             | 15 (2.5)             | 0.165   |
| Peptic ulcer disease, n (%)               | 5 (0.3)              | 1 (0.1)              | 4 (0.7)              | 0.071   |

(Continued)

**Table 1.** (Continued)

| Variables                                     | Total<br>(n = 1605) | NKD<br>(n = 998) | AKI<br>(n = 607) | p-value |
|-----------------------------------------------|---------------------|------------------|------------------|---------|
| Mild liver disease, n (%)                     | 51 (3.2)            | 26 (2.6)         | 25 (4.1)         | 0.094   |
| Diabetes without chronic complications, n (%) | 209 (13.0)          | 96 (9.6)         | 113 (18.6)       | < 0.001 |
| Diabetes with chronic complications, n (%)    | 37 (2.3)            | 17 (1.7)         | 20 (3.3)         | 0.039   |
| Paraplegia, n (%)                             | 188 (11.7)          | 97 (9.7)         | 91 (15)          | 0.001   |
| Malignant cancer, n (%)                       | 385 (24.0)          | 288 (28.9)       | 97 (16)          | < 0.001 |
| Severe liver disease, n (%)                   | 10 (0.6)            | 2 (0.2)          | 8 (1.3)          | 0.008   |
| Metastatic solid tumor, n (%)                 | 230 (14.3)          | 172 (17.2)       | 58 (9.6)         | < 0.001 |
| AIDS, n (%)                                   | 5 (0.3)             | 4 (0.4)          | 1 (0.2)          | 0.656   |
| <b>Severity scores</b>                        |                     |                  |                  |         |
| Charlson comorbidity index, Median (IQR)      | 4.0 (2.0, 6.0)      | 4.0 (2.0, 6.0)   | 4.0 (3.0, 6.0)   | 0.081   |
| APSOIII, Mean ± SD                            | 36.0 ± 18.0         | 30.8 ± 13.6      | 44.4 ± 21.0      | < 0.001 |
| SAPSOII, Mean ± SD                            | 29.6 ± 11.0         | 27.3 ± 10.2      | 33.4 ± 11.4      | < 0.001 |
| OASIS, Mean ± SD                              | 27.6 ± 9.3          | 24.4 ± 7.8       | 32.9 ± 9.1       | < 0.001 |
| <b>Perioperative exposures</b>                |                     |                  |                  |         |
| CRRT, n (%)                                   | 4 (0.2)             | 0 (0)            | 4 (0.7)          | 0.02    |
| Mechanical ventilation, n (%)                 | 147 (9.2)           | 47 (4.7)         | 100 (16.5)       | < 0.001 |
| Mannitol, n (%)                               | 50 (3.1)            | 26 (2.6)         | 24 (4)           | 0.132   |
| Transfusion, n (%)                            | 177 (11.0)          | 60 (6)           | 117 (19.3)       | < 0.001 |
| Hypotension_24h, n (%)                        | 643 (40.1)          | 376 (37.7)       | 267 (44)         | 0.012   |
| Antiplatelet, n (%)                           | 63 (3.9)            | 39 (3.9)         | 24 (4)           | 0.963   |
| <b>Surgical procedure type</b>                |                     |                  |                  |         |
| Tumor / Resection, n (%)                      | 981 (61.1)          | 710 (71.1)       | 271 (44.6)       | < 0.001 |
| Trauma / Decompression, n (%)                 | 86 (5.4)            | 42 (4.2)         | 44 (7.2)         |         |
| Other / CSF diversion, n (%)                  | 538 (33.5)          | 246 (24.6)       | 292 (48.1)       |         |
| <b>Length of stay</b>                         |                     |                  |                  |         |
| LOS hospital (d), Median (IQR)                | 6.8 (3.8, 12.9)     | 5.6 (3.5, 9.7)   | 9.4 (5.7, 19.1)  | < 0.001 |
| LOS ICU (d), Median (IQR)                     | 2.6 (1.6, 5.0)      | 2.0 (1.3, 3.2)   | 4.1 (2.4, 8.2)   | < 0.001 |

SPO2, saturation of percutaneous oxygen; SBP, systolic blood pressure; DBP, diastolic blood pressure; MBP, mean blood pressure; WBC, white blood cell; BUN, blood urea nitrogen; INR, international normalized ratio; PT, prothrombin time; PTT, partial thromboplastin time; APS III, acute physiology score III; SAPS II, simplified acute physiology score II; OASIS, Oxford acute severity of illness score; LOS hospital, length of stay in the hospital; LOS ICU, length of stay in the ICU.

<https://doi.org/10.1371/journal.pone.0343653.t001>

**3.1.3. The impact of platelet levels on AKI.** Table 3 displays the results of a multivariate logistic regression analysis, using the lowest tertile of platelet counts as the reference category. The data reveal a statistically significant inverse association between elevated platelet levels and the risk of AKI in neurosurgical patients admitted to the ICU. After controlling for potential confounding variables, individuals in the second tertile ( $179 < \text{PLT} \leq 234$ ) and the third tertile ( $\text{PLT} > 234$ ) demonstrated a decreased likelihood of developing AKI compared to those in the lowest tertile ( $\text{PLT} < 179$ ). These findings imply that neurosurgical ICU patients with lower platelet counts are more susceptible to developing AKI within the first seven days of admission.

The restricted cubic spline analysis shown in Fig 3 indicates a significant nonlinear relationship between platelet levels and the risk of AKI in neurosurgical patients after admission to the ICU ( $P < 0.01$ ). Specifically, lower platelet levels are associated with a higher risk of AKI. When  $\text{PLT} < 204 \times 10^9/\text{L}$ , the risk of AKI significantly decreases as platelet levels increase; however, when  $\text{PLT} > 204 \times 10^9/\text{L}$ , although the risk of AKI still decreases with increasing platelet levels, the rate of decline is significantly slower.

**Table 2. Univariate logistic analysis of platelet levels and the incidence of AKI within 7 days of ICU admission.**

| Variable                               | HR (95 CI)        | p-value |
|----------------------------------------|-------------------|---------|
| Platelets                              | 0.99 (0.99~1)     | <0.001  |
| Gender (Male)                          | 1.47 (1.2~1.81)   | <0.001  |
| Age                                    | 1.01 (1.01~1.02)  | <0.001  |
| Race (African American)                | 1.27 (0.88~1.84)  | 0.205   |
| Race (Asian)                           | 0.95 (0.55~1.64)  | 0.855   |
| Race (Other)                           | 1.43 (1.12~1.83)  | 0.004   |
| Heart rate                             | 1.02 (1.01~1.02)  | <0.001  |
| SBP                                    | 1.01 (1~1.02)     | 0.038   |
| DBP                                    | 0.98 (0.97~0.99)  | 0.001   |
| MBP                                    | 0.98 (0.97~1)     | 0.009   |
| Respiratory rate                       | 1.14 (1.1~1.18)   | <0.001  |
| Temperature                            | 2.06 (1.62~2.63)  | <0.001  |
| SpO <sub>2</sub>                       | 1.22 (1.14~1.29)  | <0.001  |
| Glucose                                | 1.01 (1~1.01)     | <0.001  |
| Hematocrit                             | 0.93 (0.92~0.95)  | <0.001  |
| Hemoglobin                             | 0.82 (0.78~0.87)  | <0.001  |
| WBC                                    | 1.02 (1~1.03)     | 0.039   |
| Aniongap                               | 0.97 (0.94~1)     | 0.087   |
| Bicarbonate                            | 0.94 (0.91~0.97)  | <0.001  |
| Bun                                    | 1.05 (1.03~1.07)  | <0.001  |
| Calcium                                | 0.66 (0.56~0.76)  | <0.001  |
| Chloride                               | 0.97 (0.95~0.99)  | 0.002   |
| Creatinine                             | 5.5 (3.71~8.14)   | <0.001  |
| Sodium                                 | 1.06 (1.03~1.09)  | <0.001  |
| Potassium                              | 0.55 (0.43~0.69)  | <0.001  |
| INR                                    | 4.34 (2.79~6.77)  | <0.001  |
| PT                                     | 1.17 (1.12~1.22)  | <0.001  |
| PTT                                    | 1.02 (1.01~1.03)  | <0.001  |
| Myocardial infarct                     | 2.82 (1.7~4.69)   | <0.001  |
| Congestive heart failure               | 3.25 (1.96~5.39)  | <0.001  |
| Peripheral vascular disease            | 1.2 (0.68~2.12)   | 0.536   |
| Dementia                               | 2.27 (1.04~4.98)  | 0.04    |
| Cerebrovascular disease                | 1.89 (1.5~2.38)   | <0.001  |
| Chronic pulmonary disease              | 1.19 (0.87~1.62)  | 0.287   |
| Rheumatic disease                      | 1.66 (0.81~3.42)  | 0.169   |
| Peptic ulcer disease                   | 6.61 (0.74~59.31) | 0.091   |
| Mild liver disease                     | 1.61 (0.92~2.81)  | 0.096   |
| Diabetes without chronic complications | 2.15 (1.6~2.88)   | <0.001  |
| Diabetes with chronic complications    | 1.97 (1.02~3.78)  | 0.043   |
| Paraplegia                             | 1.64 (1.21~2.22)  | 0.002   |
| Malignant cancer                       | 0.47 (0.36~0.61)  | <0.001  |
| Severe liver disease                   | 6.65 (1.41~31.43) | 0.017   |
| Metastatic solid tumor                 | 0.51 (0.37~0.7)   | <0.001  |
| AIDS                                   | 0.41 (0.05~3.68)  | 0.426   |
| Charlson comorbidity index             | 1.02 (0.99~1.05)  | 0.268   |

(Continued)

**Table 2.** (Continued)

| Variable               | HR (95 CI)       | p-value |
|------------------------|------------------|---------|
| APSIII                 | 1.05 (1.04~1.05) | <0.001  |
| SAPSI                  | 1.05 (1.04~1.06) | <0.001  |
| OASIS                  | 1.12 (1.1~1.13)  | <0.001  |
| Mechanical ventilation | 3.99 (2.78~5.74) | <0.001  |
| LOS hospital           | 1.04 (1.03~1.05) | <0.001  |
| LOS ICU                | 1.18 (1.15~1.22) | <0.001  |

SPO<sub>2</sub>, saturation of percutaneous oxygen; SBP, systolic blood pressure; DBP, diastolic blood pressure; MBP, mean blood pressure; WBC, white blood cell; BUN, blood urea nitrogen; INR, international normalized ratio; PT, prothrombin time; PTT, partial thromboplastin time; APS III, acute physiology score III; SAPSI, simplified acute physiology score II; OASIS, Oxford acute severity of illness score; LOS hospital, length of stay in the hospital; LOS ICU, length of stay in the ICU.

<https://doi.org/10.1371/journal.pone.0343653.t002>

**3.1.4. Subgroup analysis.** Fig 4A shows the relationship between platelet levels and the occurrence of AKI within 7 days after admission to the ICU in neurosurgical patients evaluated through subgroup analysis. After stratification analysis based on factors such as age, race, gender, history of myocardial infarction, history of congestive heart failure, and chronic obstructive pulmonary disease, no significant interaction was found among the subgroups (P-Values for interaction terms were all greater than 0.05). Subgroup analyses (Fig 4B) stratified by surgical type (Tumor/Resection, Trauma/Decompression, and Other/Cerebrospinal Fluid Diversion) demonstrated consistent associations between platelet tertiles and AKI across subgroups, with no statistically significant interaction detected (P for interaction = 0.628). Fig 4C presents subgroup analysis results stratified by the use of early antiplatelet agents (aspirin, clopidogrel, or ticagrelor) within 24 hours of ICU admission. Among patients without early antiplatelet exposure, lower platelet count categories were associated with a stepwise increase in AKI risk. A comparable directional association was observed in patients who received early antiplatelet therapy; however, the confidence intervals were wider due to a smaller sample size. Importantly, no statistically significant interaction was detected between platelet count categories and early antiplatelet agent use with respect to AKI risk (interaction P > 0.05).

**3.1.5. Sensitivity analysis.** In sensitivity analyses with the first platelet count post-ICU admission and the mean platelet count within the first 24 hours of ICU admission as exposure variables, analogous nonlinear associations between platelet levels and AKI risk were observed, characterized by comparable nadir risk points and consistent overall trends (S1A–B Fig).

### 3.2. Analysis of the long-term prognosis (1-year mortality rate)

**3.2.1. Bounded cubic spline function.** Fig 5 illustrates the association between 1-year mortality and platelet counts measured on the first day of hospital admission in patients who received surgical interventions. The findings indicate that both abnormally low and high platelet levels were linked to an increased risk of death within one year. This finding indicates a J-shaped curve association between platelet levels and the 1-year mortality rate in this patient cohort (P < 0.001). Based on the restricted cubic spline analysis, within our tertile stratification, the platelet level range corresponding to the lowest 1-year mortality risk was 179–234 (10<sup>9</sup>/L). When the platelet level was lower than 179, the risk increased steeply. Beyond 234, although the risk continued to rise, the trend was more gradual, presenting a plateau effect. This phenomenon elucidates the intricate and non-linear relationship characteristics between platelet levels and the one-year mortality rate among these patients.

**3.2.2. Multivariable Cox regression analysis.** Table 4 displays the unadjusted and adjusted estimates concerning the association between platelet levels within 24 hours subsequent to admission to the ICU and the

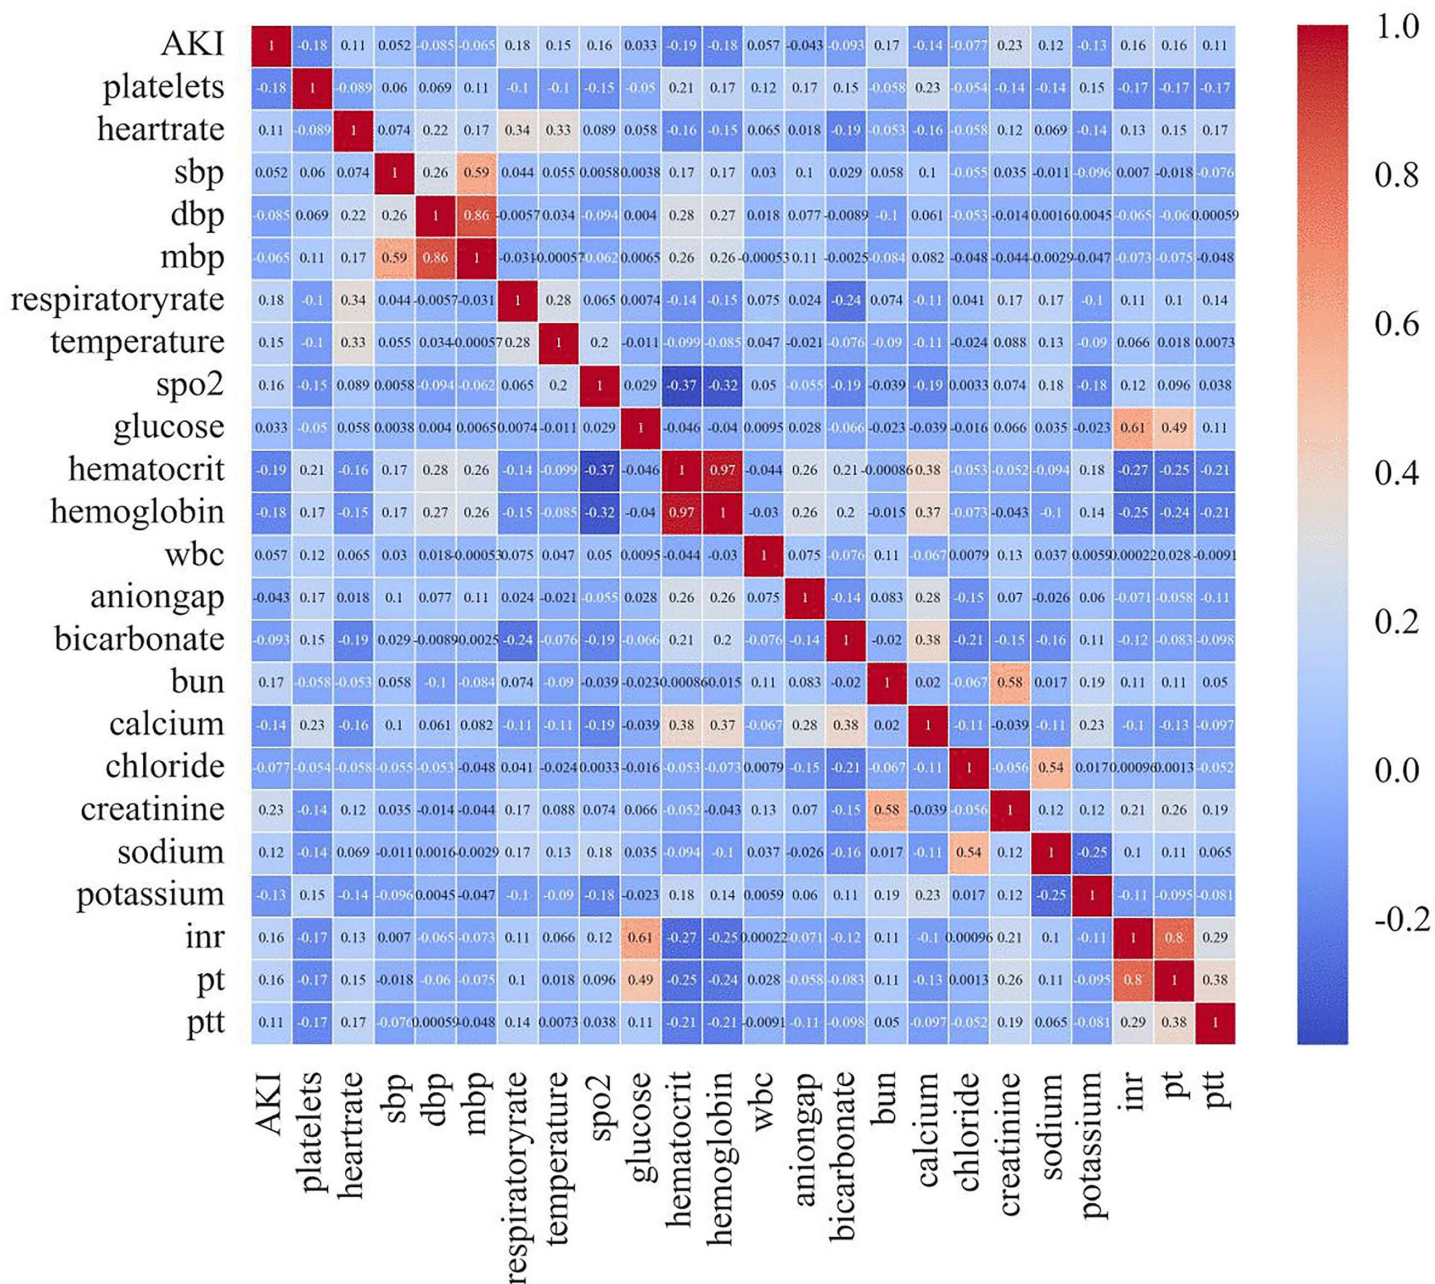

Fig 2. Multivariate correlation analysis.

<https://doi.org/10.1371/journal.pone.0343653.g002>

one-year mortality rate among neurosurgical patients, as derived from the Cox regression model. When considering SpO<sub>2</sub> as a categorical variable, using the second platelet-level subgroup (Q2, 179 < PLT ≤ 234) as the reference group, following comprehensive adjustment, the one-year mortality risk in the low-platelet-level subgroup (Q1, PLT ≤ 179) was notably elevated (HR1: 1.45, [95% CI: 1.11–1.9], P = 0.007). In the high-platelet-level subgroup (Q3, PLT > 234), although the one-year mortality risk was indicated to increase, the difference was not statistically significant (HR2: 1.15, [95% CI: 0.87–1.52], P > 0.05).

**Table 3. Analysis of the Association between Platelet Levels and the Incidence of Acute Kidney Injury (AKI) within 7 Days after ICU Admission among Neurosurgical Patients in a Multivariate Regression Model.**

| Variable     | Model 1          |         | Model 2          |         | Model 3          |         | Model 4          |         |
|--------------|------------------|---------|------------------|---------|------------------|---------|------------------|---------|
|              | HR (95%CI)       | P-value | HR (95%CI)       | P-value | HR (95%CI)       | P-value | HR (95%CI)       | P-value |
| PLT tertials |                  |         |                  |         |                  |         |                  |         |
| <179         | 1(Reference)     |         | 1(Reference)     |         | 1(Reference)     |         | 1(Reference)     |         |
| 179-234      | 0.57 (0.45~0.73) | <0.001  | 0.45 (0.35~0.58) | <0.001  | 0.73 (0.56~0.94) | 0.017   | 0.76 (0.58~0.99) | 0.045   |
| >234         | 0.42 (0.33~0.54) | <0.001  | 0.67 (0.59~0.76) | <0.001  | 0.57 (0.43~0.74) | <0.001  | 0.62 (0.47~0.82) | 0.001   |
| P for trend  |                  | <0.001  |                  | <0.001  | 0.75 (0.66~0.86) | <0.001  | 0.79 (0.68~0.91) | 0.001   |

Model 1: No adjusted.

Model 2: Adjusted for age and gender.

Model 3: Adjusted for age, gender, procedure type, transfusion, mannito, hypotension, antiplatelet.

Model 4: Adjusted for model 3 plus Bun, creatinine, congestive heart failure, CRRT and mechanical ventilation.

<https://doi.org/10.1371/journal.pone.0343653.t003>

**3.2.3. Cumulative mortality curve analysis.** By precisely calculating the daily cumulative mortality rate of patients in three different platelet level subgroups within 365 days after admission, [Fig 6](#) clearly shows a stratified mortality trend: the normal platelet level group (Q2,  $179 < \text{PLT} \leq 234$ ), the high platelet level group (Q3,  $\text{PLT} > 234$ ), and the low platelet level group (Q1,  $\text{PLT} \leq 179$ ). Notably, this observed trend is highly consistent with the results of the Cox multivariate regression analysis.

**3.2.4. Subgroup analysis.** During the subgroup analysis (as shown in [Fig 7A](#)), no statistically significant interactions were detected between platelet counts and factors such as age, ethnicity, sex, or duration of intensive care unit admission. All corresponding P-Values exceeded 0.05. In the surgical type-stratified subgroup analysis for 1-year mortality ([Fig 7B](#)), the interaction test did not achieve statistical significance ( $P$  for interaction = 0.094), indicating insufficient evidence for a modifying effect of surgical type on the association. [Fig 7C](#) presents subgroup analyses stratified by early antiplatelet agent use. Among patients without early antiplatelet exposure, lower platelet count categories were associated with an elevated 1-year mortality risk. A consistent trend was observed in patients who received antiplatelet agents within 24 hours of ICU admission. No statistically significant interaction was detected between platelet levels and early antiplatelet agent use with respect to 1-year mortality (interaction  $P > 0.05$ ), indicating that early antiplatelet therapy did not modify the association between platelet count and long-term survival.

**3.2.5. Sensitivity analysis.** In sensitivity analyses with the first platelet count post-ICU admission and the mean platelet count within the first 24 hours of ICU admission as exposure variables, the nonlinear association between platelet levels and 1-year mortality remained statistically significant, with comparable curve morphology and nadir risk points to the primary analysis ([S2A–B Fig](#)).

### 3.3. External validation

[S3 Fig](#) presents the patient selection process for the external validation cohort, which applied identical inclusion and exclusion criteria as the derivation cohort. [S4 Fig](#) shows the nonlinear association between the lowest platelet count within 24 hours after ICU admission and (A) the risk of AKI within 7 days (using a logistic regression model) and (B) 1-year all-cause mortality (using a Cox proportional hazards model) in the MIMIC-III cohort as demonstrated by restricted cubic spline analysis. Both models revealed a highly significant overall and nonlinear association between platelet levels and outcomes (overall  $P < 0.001$ ; nonlinear  $P < 0.001$ ).

## 4. Discussion

During the early perioperative period of critically ill neurosurgical patients, platelet counts exhibit marked dynamic changes, which are primarily driven by acute pathophysiological processes. In the immediate postoperative phase and

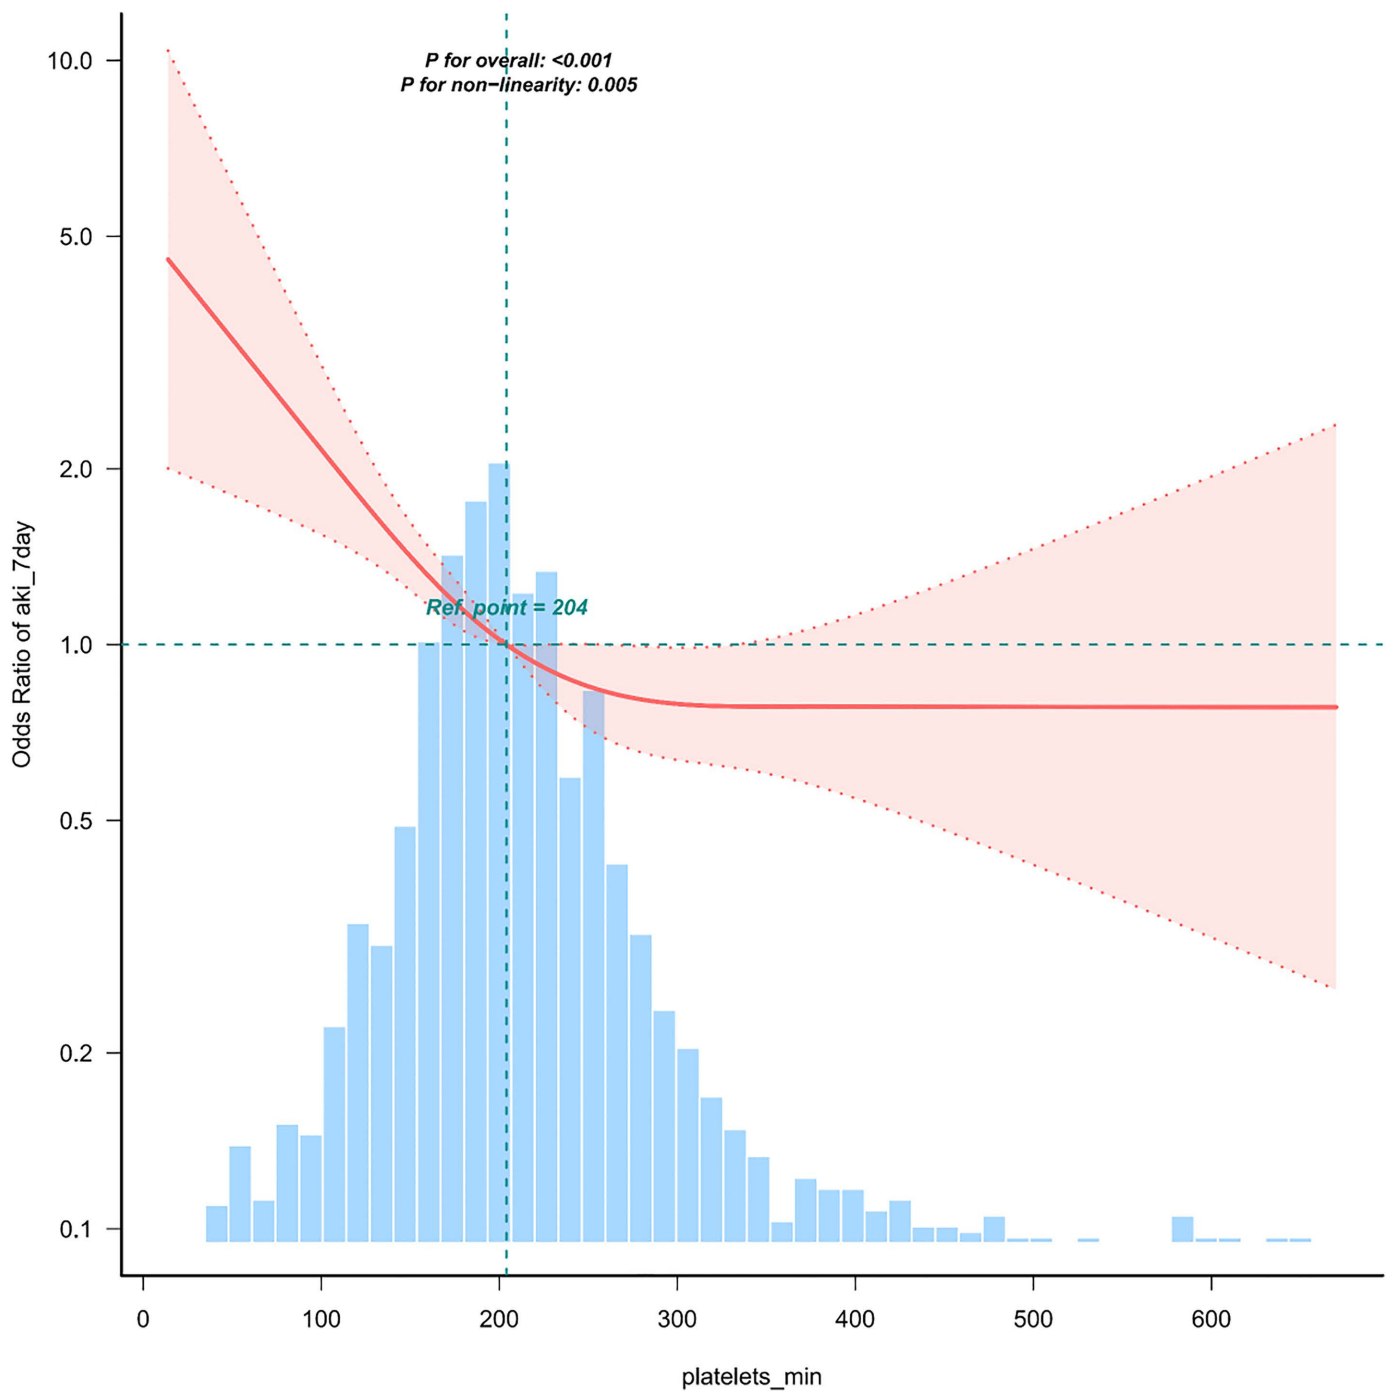

**Fig 3. The association between platelet levels and the risk of AKI within 7 days after admission to the ICU in neurosurgical patients.**

<https://doi.org/10.1371/journal.pone.0343653.g003>

the initial stage following ICU admission, massive fluid resuscitation and administration of vasoactive agents may induce hemodilutional thrombocytopenia. Concurrently, factors including surgical trauma, vascular endothelial injury, active hemorrhage, infection, and thrombosis can further augment the acute consumption of platelets [17]. Prior research has

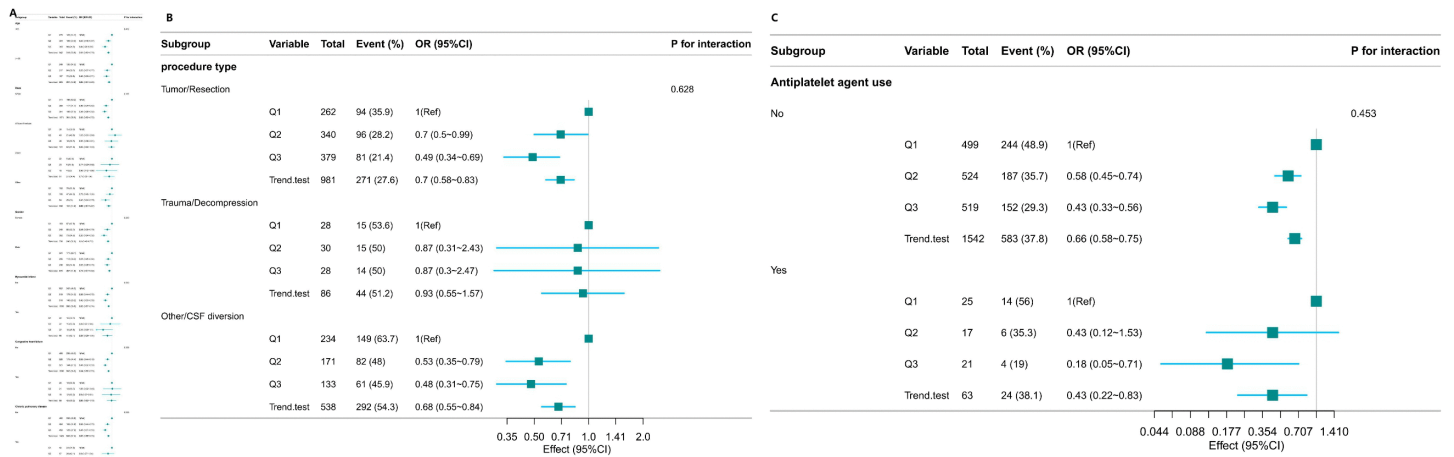

**Fig 4. (A-C). The relationship between platelet levels and the occurrence of AKI within 7 days after admission to the ICU in neurosurgical patients in subgroup analysis.**

<https://doi.org/10.1371/journal.pone.0343653.g004>

demonstrated that platelet counts typically reach the nadir within 24–48 hours postoperatively, reflecting the combined effects of acute injury and perioperative physiological stress [18]. Beyond 72 hours, however, platelet levels may gradually increase due to compensatory bone marrow hyperplasia, thereby masking the severity of early-stage injury [17]. Hence, in the present study, the minimum platelet count within 24 hours after ICU admission was selected to capture the critical time window of perioperative acute hemodilution and platelet consumption, thus more authentically reflecting the overall burden of early postoperative microcirculatory dysfunction and coagulation system derangement. Through multivariable logistic regression analyses, our study demonstrated that, among neurosurgical patients admitted to the ICU, lower platelet levels within the first 24 hours were associated with a higher risk of AKI within 7 days. In addition, this retrospective cohort study revealed a significant association between early platelet levels and 1-year mortality. Restricted cubic spline analyses further illustrated a J-shaped non-linear relationship between platelet count and long-term mortality, indicating that both markedly low and high platelet levels were associated with increased mortality risk, with the association being more pronounced at lower platelet levels.

In neurosurgical patients, AKI and thrombocytopenia frequently co-occur and exert notable adverse impacts on clinical outcomes. The incidence of AKI among patients after neurosurgical operations ranges from 10% to 14% [19]. Thrombocytopenia is especially prevalent in children undergoing neurosurgical procedures. Specifically, in patients receiving intravenous valproic acid (VPA) treatment, its incidence is affected by the baseline platelet count. Those with a lower baseline platelet count face a higher risk [20]. Post-operative thrombocytopenia is closely associated with a variety of adverse prognoses. These include an elevated mortality rate, an extended length of stay in the ICU, as well as the occurrence of complications such as AKI, stroke, limb ischemia, and mesenteric ischemia [21,22]. In patients with traumatic brain injury (TBI), around 10% develop early-onset thrombocytopenia during their ICU admission, and this is an independent risk factor for death in patients with moderate to severe TBI [23]. Moreover, late-onset thrombocytopenia is strongly associated with a significantly shortened survival time [22]. AKI itself may act as one of the contributing factors to thrombocytopenia. In individuals with impaired renal function, the incidence of severe thrombocytopenia is higher [24].

The existing literature has indicated that platelet count is associated with AKI and mortality in ICU patients. However, the majority of studies have concentrated on non-surgical populations or specific disease groups (such as stroke or respiratory failure), lacking a specific analysis for patients following neurosurgical procedures [25–27]. This study represents the first attempt to validate the non-linear effect of platelet count on the risk of AKI within a post-neurosurgical cohort, thus

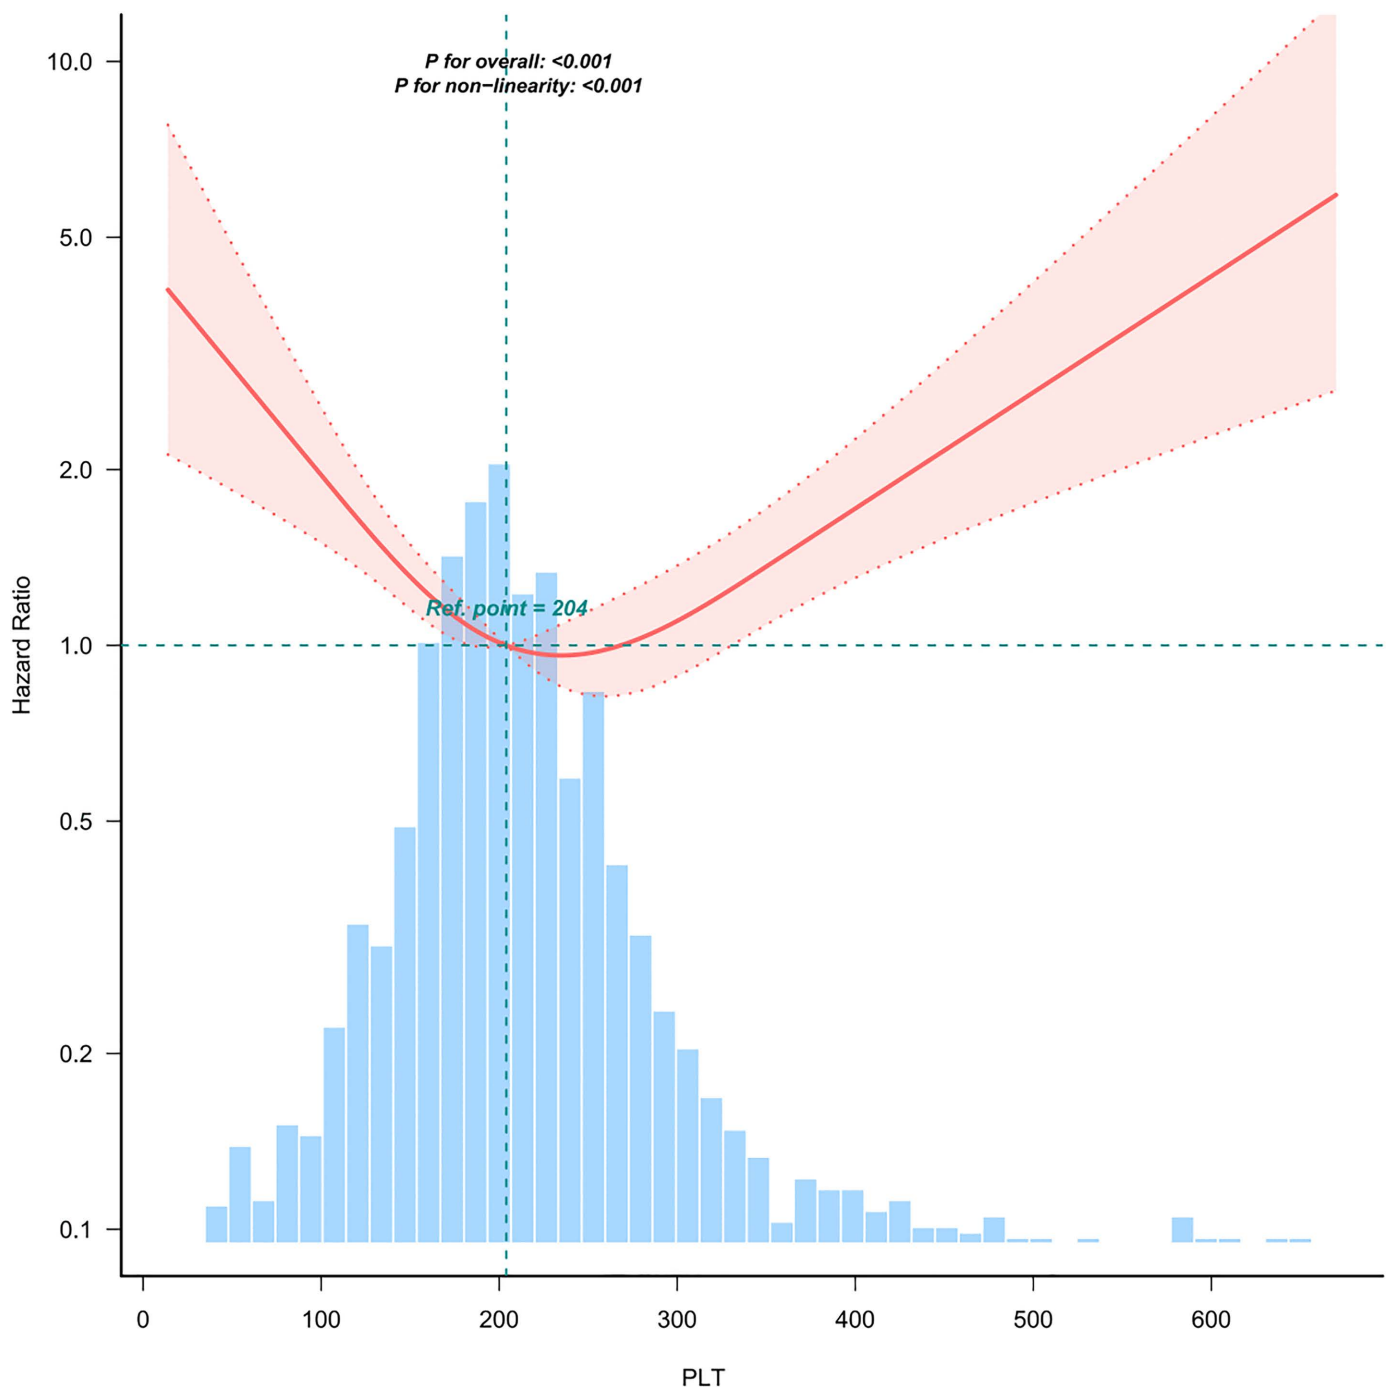

**Fig 5. The association between platelet levels within 7 days after admission to the ICU and one-year mortality risk in neurosurgical patients.**  
<https://doi.org/10.1371/journal.pone.0343653.g005>

filling a theoretical void in this domain. Previous research has shown that in patients with end-stage renal disease (ESRD), a platelet count of around  $222 \times 10^9/L$  is associated with the lowest mortality rate [26]. In contrast, this study extends the generalizability of our findings to the post-neurosurgical population, with a focus on highlighting population-specific risk

**Table 4. The hazard ratios and 95% confidence intervals of platelets in relation to the one – year mortality rate.**

| Variable     | Model 1          |         | Model 2          |         | Model 3          |         |
|--------------|------------------|---------|------------------|---------|------------------|---------|
|              | HR (95%CI)       | P-value | HR (95%CI)       | P-value | HR (95%CI)       | P-value |
| PLT tertials |                  |         |                  |         |                  |         |
| <179         | 1.53 (1.17~2)    | 0.002   | 1.4 (1.07~1.83)  | 0.014   | 1.45 (1.11~1.9)  | 0.007   |
| 179-234      | 1(Reference)     |         | 1(Reference)     |         | 1(Reference)     |         |
| >234         | 0.86 (0.75~0.98) | 0.316   | 1.17 (0.89~1.55) | 0.256   | 1.15 (0.87~1.52) | 0.329   |

Model 1: No adjusted.

Model 2: Adjusted for age and gender.

Model 3: Adjusted for age, gender, temperature, BUN, peripheral vascular disease, and charlson comorbidity index.

<https://doi.org/10.1371/journal.pone.0343653.t004>

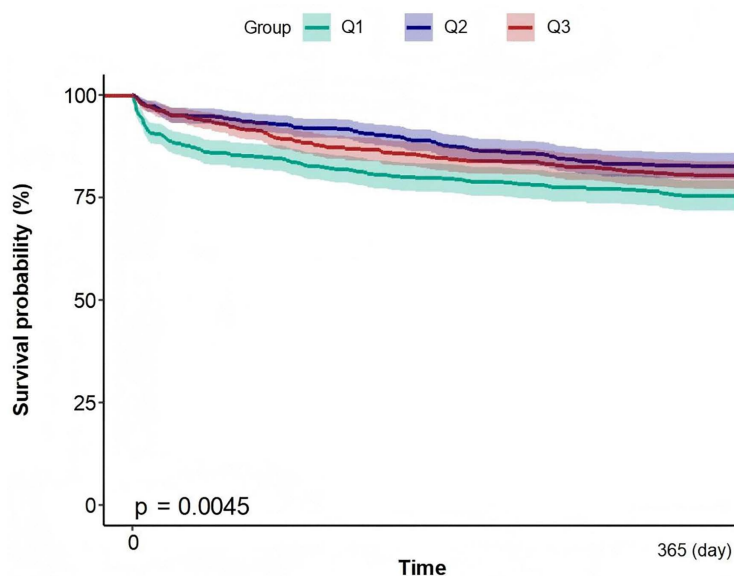

**Fig 6. Cumulative mortality curves within 365 days after admission for patients in different platelet level groups.**

<https://doi.org/10.1371/journal.pone.0343653.g006>

patterns rather than establishing universally applicable therapeutic thresholds. Furthermore, this study comprehensively employs logistic regression and the Cox proportional hazards model, enabling a dual validation of both the short-term AKI risk and long-term prognosis. Compared to studies that solely focus on a single endpoint, this approach offers more clinically instructive insights. Importantly, the observed non-linear associations were consistently replicated in an independent external cohort derived from the MIMIC-III database.

In neurosurgical patients, thrombocytopenia may mirror the severity of surgical trauma and the systemic inflammatory response [28]. Neurosurgical operations, such as the resection of brain tumors or surgeries for traumatic brain injury, are frequently accompanied by pronounced inflammatory responses, including the elevation of interleukin-6 (IL-6), tumor necrosis factor- $\alpha$  (TNF- $\alpha$ ), etc. The levels of these inflammatory factors are significantly correlated with coagulation parameters, disseminated intravascular coagulation (DIC), and AKI [29,30]. Simultaneously, inflammatory factors can promote platelet consumption by activating platelets, thereby resulting in thrombocytopenia [31]. Numerous studies have indicated that postoperative thrombocytopenia is a crucial predictive indicator of multiple organ dysfunction syndrome (MODS) in patients. It is independently associated with an increased risk of mortality, AKI, and other organ complications

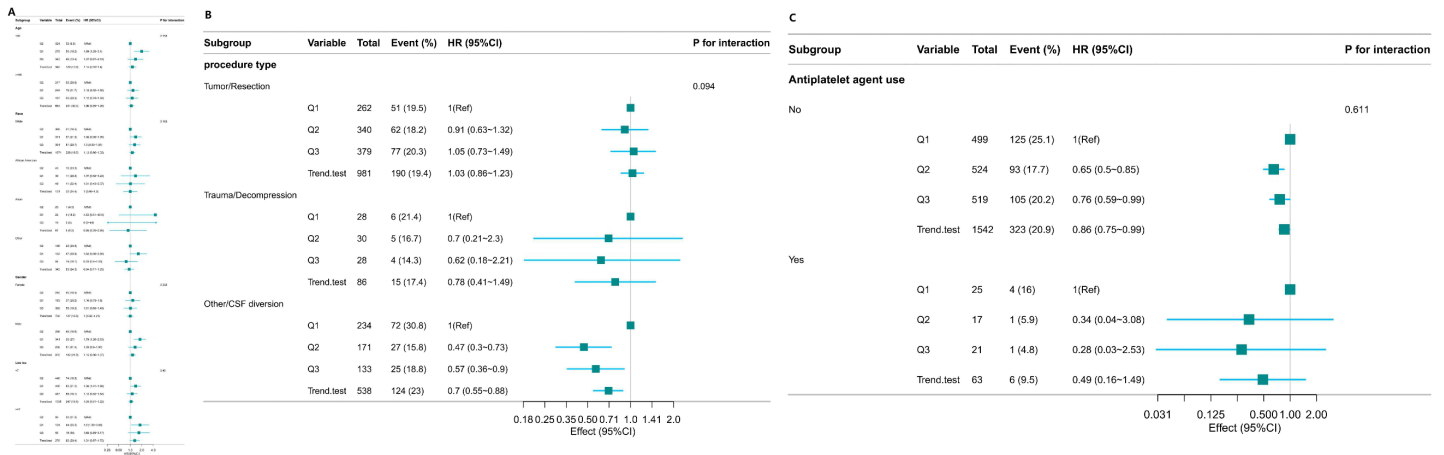

**Fig 7. (A-C). Forest Plot of Subgroup Analysis on the Association between Platelet Levels and One – year Mortality.**

<https://doi.org/10.1371/journal.pone.0343653.g007>

[21,32]. Accordingly, thrombocytopenia is more likely to serve as a marker of disease severity rather than a direct causal factor.

More significantly, thrombocytopenia may exacerbate renal injury via multiple mechanisms: (1) Coagulation-fibrinolysis imbalance: Thrombocytopenia often coincides with the early alterations of DIC. The formation of microthrombi can cause microcirculatory disorders in the kidneys [31,33,34]. (2) Endothelial injury and hypoperfusion: Inflammatory responses, such as the activation of endothelial cells by TNF- $\alpha$ , can weaken the repair ability of endothelial cells and intensify ischemic tubular injury in the kidneys [35,36]. (3) Uncontrolled inflammatory response: Platelets play a role in immunoregulation. A decrease in their number may lead to the excessive formation of neutrophil extracellular traps (NETs), thereby exacerbating renal inflammatory injury through the immunothrombotic mechanism [37,38]. Collectively, these mechanisms contribute to the development of AKI in this group of patients.

Post-operative thrombocytopenia can remarkably augment the risk of bleeding events. In this group of patients, the incidence of major hemorrhage (> 400 ml) is relatively high, and platelet transfusion is frequently necessary [39]. Persistent bleeding not only gives rise to hemorrhagic shock and organ hypoperfusion but may also indirectly prolong the length of stay in the ICU due to complications associated with transfusion, such as infections and immune responses [40]. It is worth noting that a dynamic decline in platelet count is more strongly correlated with 30-day mortality. This indicates that the progressive deterioration of the coagulation system may exacerbate organ damage through a vicious cycle of bleeding and transfusion, ultimately influencing the 1-year survival rate [41]. Furthermore, thrombocytopenia often serves as a biological indicator of severe inflammatory responses. Research has revealed that patients in the low-platelet-count group exhibit significantly elevated inflammatory markers upon admission. This may be attributed to the extensive consumption of platelets after their over-activation by inflammatory factors [42]. Meanwhile, during the process of microthrombus formation, the aggregation of platelets and leukocytes exacerbates endothelial injury, and platelet-derived micro-particles further promote the formation of NETs [37,43]. This inflammatory micro-environment has a high propensity to trigger postoperative sepsis. A decrease in platelet count by more than 25% has been proven to be independently associated with the 30-day mortality of sepsis patients [44]. Beyond being a marker of injury, thrombocytopenia may directly contribute to the exacerbation of organ failure. A reduction in platelet-derived growth factors (PDGF/VEGF) can impede endothelial repair, thereby intensifying the chronic progression following AKI [39,45]. Studies have shown that in patients after cardiac surgery, a dynamic decline in platelet count is significantly associated with cardiogenic shock. Myocardial microcirculation disorders may impact long-term prognosis through persistent cardiac dysfunction [41]. Additionally,

patients with elevated lactate levels are more likely to experience decompensation of liver and kidney function, suggesting that thrombocytopenia may expand the scope of organ damage via hypoxia-reperfusion injury [45,46]. These complex interactions among multiple systems ultimately increase the risk of patient mortality.

Our study suggests that platelet levels may be associated with the risk of AKI and long-term prognosis in patients admitted to neurosurgical intensive care units. Early dynamic monitoring of platelet trajectories, combined with comprehensive assessment using the Acute Physiology and Chronic Health Evaluation II (APACHE-II) score, may enhance AKI risk stratification and clinical early warning systems. Nevertheless, prospective studies are warranted to validate whether interventions targeting platelet abnormalities—such as platelet transfusion or pharmacological therapy—can reduce the incidence of AKI and improve long-term outcomes.

#### 4.1. Limitations and future prospects

Meanwhile, this study has several limitations. Firstly, given its retrospective design, it is challenging to fully rule out the confounding effects of underlying diseases, medications, and other factors. This may introduce certain biases into the results. Secondly, platelet count does not comprehensively capture the functional status of platelets, which may exert a critical role in the pathophysiological mechanisms underlying AKI. Owing to the retrospective design of this study and the absence of systematic platelet function assay data in the MIMIC-IV database, we were unable to evaluate platelet aggregation capacity or global functional activity. Thirdly, future multi-center investigations are essential to validate and generalize these findings. For subsequent research, prospective cohort studies are recommended. These should be complemented by molecular mechanism analyses to identify neurosurgery-specific biomarkers. Additionally, optimizing real-time monitoring tools will be crucial for implementing personalized intervention strategies. This approach will contribute to a more comprehensive understanding of the subject and potentially improve patient outcomes.

#### 5. Conclusion

In critically ill neurosurgical patients, platelet counts measured early after admission to the ICU demonstrated a significant non-linear association with both the risk of AKI within 7 days post-surgery and 1-year all-cause mortality. Specifically, the risk of AKI increased significantly when platelet counts fell below approximately  $204 \times 10^9/L$ . Additionally, both extremely low and extremely high platelet counts were associated with elevated mortality risk, with a stronger correlation observed between marked thrombocytopenia and adverse long-term outcomes. After multivariate adjustment, patients with platelet levels in the range of  $179\text{--}234 \times 10^9/L$  exhibited a lower AKI risk and higher survival probability. These findings suggest that early post-admission platelet counts may serve as a readily accessible biomarker for risk stratification and early identification of postoperative AKI and long-term prognosis. However, given the retrospective observational design of this study, the aforementioned range should be interpreted as a statistically associated range corresponding to the lowest risk, rather than a definitive therapeutic target for clinical intervention. Further prospective studies are warranted to validate the causal relationship and optimize clinical application strategies.

#### Supporting information

**S1 Fig. Sensitivity Analysis of Platelet Levels Within 7 Days After ICU Admission and AKI Risk in Neurosurgical Patients: (A) First Platelet Measurement Following ICU Admission and AKI Risk; (B) Mean Platelet Value Within 24 Hours After ICU Admission and AKI Risk.**

(TIF)

**S2 Fig. Sensitivity Analysis of Platelet Levels Following ICU Admission and 1-Year Mortality Risk in Neurosurgical Patients: (A) First Platelet Measurement After ICU Admission and 1-Year Mortality Risk; (B) Mean Platelet Value Within 24 Hours After ICU Admission and 1-Year Mortality Risk.**

(TIF)

**S3 Fig. Flowchart of Inclusion and Exclusion Criteria for the External Validation Cohort.**

(TIF)

**S4 Fig. External Validation of Restricted Cubic Splines: (A) Platelet Count and Risk of Acute Kidney Injury (AKI) Within 7 Days; (B) Platelet Count and 1-Year All-Cause Mortality.**

(TIF)

**Author contributions**

**Conceptualization:** Shu Yang.

**Data curation:** Guoqing Li.

**Funding acquisition:** Minmin Zhu.

**Writing – original draft:** Shu Yang.

**Writing – review & editing:** Shu Yang, Shuo Zhang, Guowei Zhu, Linfeng Fang, Minmin Zhu.

**References**

1. Kunapaisal T, Phuong J, Liu Z, Stansbury LG, Vavilala MS, Lele AV, et al. Age, admission platelet count, and mortality in severe isolated traumatic brain injury: A retrospective cohort study. *Transfusion*. 2023;63(8):1472–80. <https://doi.org/10.1111/trf.17476> PMID: 37515367
2. Kapisiz A, Kaya C, Eryilmaz S, Karabulut R, Turkyilmaz Z, Inan MA, et al. Protective effects of lupeol in rats with renal ischemia-reperfusion injury. *Exp Ther Med*. 2024;28(2):313. <https://doi.org/10.3892/etm.2024.12602> PMID: 38911048
3. Wong WEJ, Chan SP, Yong JK, Tham YYS, Lim JRG, Sim MA, et al. Assessment of acute kidney injury risk using a machine-learning guided generalized structural equation model: a cohort study. *BMC Nephrol*. 2021;22(1):63. <https://doi.org/10.1186/s12882-021-02238-9> PMID: 33618695
4. Noce A, Marrone G, Di Lauro M, Mitterhofer AP, Ceravolo MJ, Di Daniele N, et al. The Onco-Nephrology Field: The Role of Personalized Chemotherapy to Prevent Kidney Damage. *Cancers (Basel)*. 2023;15(8):2254. <https://doi.org/10.3390/cancers15082254> PMID: 37190182
5. Soum E, Timsit J-F, Ruckly S, Gruson D, Canet E, Klouche K, et al. Predictive factors for severe long-term chronic kidney disease after acute kidney injury requiring renal replacement therapy in critically ill patients: an ancillary study of the ELVIS randomized controlled trial. *Crit Care*. 2022;26(1):367. <https://doi.org/10.1186/s13054-022-04233-4> PMID: 36447221
6. Liu C, Wang S, Wang X. Effect of transthoracic echocardiography on short-term outcomes in patients with acute kidney injury in the intensive care unit: a retrospective cohort study based on the MIMIC-III database. *Ann Transl Med*. 2022;10(15):826. <https://doi.org/10.21037/atm-22-3158> PMID: 36034992
7. Almutairi A, Alenezi F, Tamim H, Sadat M, Humaid FB, AlMatrood A, et al. The prevalence of acute kidney injury in patients with community-acquired pneumonia who required mechanical ventilation. *Ann Saudi Med*. 2024;44(2):104–10. <https://doi.org/10.5144/0256-4947.2024.104> PMID: 38615183
8. Jensen JLS, Hviid CVB, Hvas CL, Christensen S, Hvas A-M, Larsen JB. Platelet Function in Acute Kidney Injury: A Systematic Review and a Cohort Study. *Semin Thromb Hemost*. 2023;49(5):507–22. <https://doi.org/10.1055/s-0042-1757167> PMID: 36174606
9. Liang Y, Liang S, Huang J, Hu L, Wu Q, Li Z, et al. The nadir platelet count in the first 48 h after ICU admission is a potential predictor of acute kidney injury in hemorrhagic shock patients. *BMC Cardiovasc Disord*. 2024;24(1):730. <https://doi.org/10.1186/s12872-024-04408-7> PMID: 39707178
10. Weinmann-Menke J, Gonzalez-Sanchez HM, Iwata Y, Meineck M, Abassi N, Marini F, et al. Ptpz Signaling, Tubule-Mediated and Macrophage-Mediated Kidney Injury, and Subsequent CKD. *J Am Soc Nephrol*. 2025;36(7):1295–309. <https://doi.org/10.1681/ASN.000000640> PMID: 39932811
11. Huang Y, Ao T, Zhen P, Hu M. Non-linear relationship between platelet count and 28-day mortality in critically ill patients with infective endocarditis: a retrospective cohort study from MIMIC IV database. *Front Cardiovasc Med*. 2024;11:1458238. <https://doi.org/10.3389/fcvm.2024.1458238> PMID: 39677035
12. Wang J, Zhou P, Li X, Zhou L, Deng Z. Association between platelet count and 30-day in-hospital mortality among intensive care unit patients with sepsis: a multicenter retrospective cohort study. *Front Med (Lausanne)*. 2025;11:1444481. <https://doi.org/10.3389/fmed.2024.1444481> PMID: 39902030
13. Kula AJ, Qu P, Strub B, Smith JM, Menon S. Major adverse kidney events after acute kidney injury in the pediatric intensive care unit: a propensity score-matched cohort study. *Pediatr Nephrol*. 2022;37(9):2099–107. <https://doi.org/10.1007/s00467-021-05348-6> PMID: 35041037
14. Kim H, Lee SW, Kim SJ, Han KS, Lee S, Song J, et al. Advancing Continuous Prediction for Acute Kidney Injury via Multi-Task Learning: Towards Better Clinical Applicability. *IEEE J Biomed Health Inform*. 2025;29(8):5949–62. <https://doi.org/10.1109/JBHI.2025.3559677> PMID: 40208760
15. Wu L, Li Y, Zhang X, Chen X, Li D, Nie S, et al. Prediction differences and implications of acute kidney injury with and without urine output criteria in adult critically ill patients. *Nephrol Dial Transplant*. 2023;38(10):2368–78. <https://doi.org/10.1093/ndt/gfad065> PMID: 37019835

16. Thierry-Antier N, Binquet C, Vinault S, Meziani F, Boissramé-Helms J, Quenot J-P, et al. Is Thrombocytopenia an Early Prognostic Marker in Septic Shock? *Crit Care Med*. 2016;44(4):764–72. <https://doi.org/10.1097/CCM.0000000000001520> PMID: [26670473](https://pubmed.ncbi.nlm.nih.gov/26670473/)
17. Skeith L, Baumann Kreuziger L, Crowther MA, Warkentin TE. A practical approach to evaluating postoperative thrombocytopenia. *Blood Adv*. 2020;4(4):776–83. <https://doi.org/10.1182/bloodadvances.2019001414> PMID: [32097460](https://pubmed.ncbi.nlm.nih.gov/32097460/)
18. Opfermann P, Bevilacqua M, Felli A, Mouhieddine M, Bachleda T, Pichler T, et al. Prognostic Impact of Persistent Thrombocytopenia During Extracorporeal Membrane Oxygenation: A Retrospective Analysis of Prospectively Collected Data From a Cohort of Patients With Left Ventricular Dysfunction After Cardiac Surgery. *Crit Care Med*. 2016;44(12):e1208–18. <https://doi.org/10.1097/CCM.0000000000001964> PMID: [27495818](https://pubmed.ncbi.nlm.nih.gov/27495818/)
19. Premuzic V, Stambolija V, Lozic M, Kovacevic J, Prelevic V, Peklic M, et al. The effect of different anesthetics on the incidence of AKI and AKD after neurosurgical procedures. *PLoS One*. 2024;19(12):e0315295. <https://doi.org/10.1371/journal.pone.0315295> PMID: [39739700](https://pubmed.ncbi.nlm.nih.gov/39739700/)
20. Du Z, Wang J, Nie G, Li Y, Liu M. Risk factors for thrombocytopenia associated with intravenous valproic acid therapy in pediatric patients undergoing neurosurgical operations. *Sci Rep*. 2025;15(1):13675. <https://doi.org/10.1038/s41598-025-98870-8> PMID: [40258981](https://pubmed.ncbi.nlm.nih.gov/40258981/)
21. Xie E, Liu J, Liu Y, Liu Y, Xue L, Fan R, et al. Association between platelet counts and morbidity and mortality after endovascular repair for type B aortic dissection. *Platelets*. 2022;33(1):73–81. <https://doi.org/10.1080/09537104.2020.1847266> PMID: [33213236](https://pubmed.ncbi.nlm.nih.gov/33213236/)
22. Alkhalifa H, Alsalman Z, Alfaraj A, Algaraash M, Alsalman M. Thrombocytopenia and clinical outcomes among patients with COVID-19 disease: A cohort study. *Health Sci Rep*. 2023;6(2):e1111. <https://doi.org/10.1002/hsr2.1111> PMID: [36794125](https://pubmed.ncbi.nlm.nih.gov/36794125/)
23. Lillemäe K, Luostarinen T, Reinikainen M, Bendel S, Laitio R, Hoppu S, et al. Early thrombocytopenia is associated with an increased risk of mortality in patients with traumatic brain injury treated in the intensive care unit: a Finnish Intensive Care Consortium study. *Acta Neurochir (Wien)*. 2022;164(10):2731–40. <https://doi.org/10.1007/s00701-022-05277-9> PMID: [35838800](https://pubmed.ncbi.nlm.nih.gov/35838800/)
24. Bai AD, McKenna S, Wise H, Loeb M, Gill SS. Safety Profile of Linezolid in Older Adults With Renal Impairment: A Population-Based Retrospective Cohort Study. *Open Forum Infect Dis*. 2022;9(12):ofac669. <https://doi.org/10.1093/ofid/ofac669> PMID: [36601560](https://pubmed.ncbi.nlm.nih.gov/36601560/)
25. Medina-González R, Zaragoza JJ, Hernández-Barajas EM, Correa-de Leon J, Claire-Del Granado R, Vazquez-Rangel A, et al. Decrease in platelet count in patients with AKI and its association with major adverse kidney events. *Ren Fail*. 2024;46(1):2359643. <https://doi.org/10.1080/0886022X.2024.2359643> PMID: [38869010](https://pubmed.ncbi.nlm.nih.gov/38869010/)
26. Zhou P, Xiao J-H, Li Y, Zhou L, Deng Z. Platelet count has a nonlinear association with 30-day in-hospital mortality in ICU end-stage kidney disease patients: a multicenter retrospective cohort study. *Sci Rep*. 2024;14(1):22535. <https://doi.org/10.1038/s41598-024-73717-w> PMID: [39341971](https://pubmed.ncbi.nlm.nih.gov/39341971/)
27. Zhou P, Guo Q-Q, Wang F-X, Zhou L, Hu H-F, Deng Z. Nonlinear relationship between platelet count and 30-day in-hospital mortality in ICU acute respiratory failure patients: a multicenter retrospective cohort study. *Eur J Med Res*. 2024;29(1):312. <https://doi.org/10.1186/s40001-024-01909-1> PMID: [38849948](https://pubmed.ncbi.nlm.nih.gov/38849948/)
28. Xu J, Zhu Y, Zhen S, Jiang X. Association between postoperative thrombocytopenia and outcomes after traumatic brain injury surgery: A cohort study. *Acta Anaesthesiol Scand*. 2023;67(7):918–24. <https://doi.org/10.1111/aas.14244> PMID: [37029532](https://pubmed.ncbi.nlm.nih.gov/37029532/)
29. Wang J, Yang X, Li Y, Huang J-A, Jiang J, Su N. Specific cytokines in the inflammatory cytokine storm of patients with COVID-19-associated acute respiratory distress syndrome and extrapulmonary multiple-organ dysfunction. *Virology*. 2021;18(1):117. <https://doi.org/10.1186/s12985-021-01588-y> PMID: [34088317](https://pubmed.ncbi.nlm.nih.gov/34088317/)
30. Pu D-B, Lin J, Pu X-J, Wang Q, Li X-N, Qi Y, et al. The discovery of potentially active diterpenoids to inhibit the pyroptosis from *Callicarpa arborea*. *Bioorg Chem*. 2022;128:106022. <https://doi.org/10.1016/j.bioorg.2022.106022> PMID: [35907376](https://pubmed.ncbi.nlm.nih.gov/35907376/)
31. Kao S-Y, Tsao C-M, Ke H-Y, Chou M-F, Wu C-C, Shih C-C. Loss of plasma fibrinogen contributes to platelet hyporeactivity in rats with septic shock. *Thromb Res*. 2024;241:109072. <https://doi.org/10.1016/j.thromres.2024.109072> PMID: [38945093](https://pubmed.ncbi.nlm.nih.gov/38945093/)
32. Parajuli B, Angurana SK, Awasthi P, Nallasamy K, Baranwal A, Bansal A, et al. Hemophagocytic Lymphohistiocytosis in a PICU of a Developing Economy: Clinical Profile, Intensive Care Needs, Outcome, and Predictors of Mortality. *Pediatr Crit Care Med*. 2021;22(1):e44–57. <https://doi.org/10.1097/PCC.0000000000002539> PMID: [33031348](https://pubmed.ncbi.nlm.nih.gov/33031348/)
33. Iba T, Connors JM, Nagaoka I, Levy JH. Recent advances in the research and management of sepsis-associated DIC. *Int J Hematol*. 2021;113(1):24–33. <https://doi.org/10.1007/s12185-020-03053-y> PMID: [33386597](https://pubmed.ncbi.nlm.nih.gov/33386597/)
34. Wei X, Tu Y, Bu S, Guo G, Wang H, Wang Z. Unraveling the Intricate Web: Complement Activation Shapes the Pathogenesis of Sepsis-Induced Coagulopathy. *J Innate Immun*. 2024;16(1):337–53. <https://doi.org/10.1159/000539502> PMID: [38815564](https://pubmed.ncbi.nlm.nih.gov/38815564/)
35. Ellermann SF, Jongman RM, Luxen M, Kuiper T, Plantinga J, Moser J, et al. Pharmacological inhibition of protein tyrosine kinases axl and fyn reduces TNF- $\alpha$ -induced endothelial inflammatory activation in vitro. *Front Pharmacol*. 2022;13:992262. <https://doi.org/10.3389/fphar.2022.992262> PMID: [36532777](https://pubmed.ncbi.nlm.nih.gov/36532777/)
36. Fodil S, Arnaud M, Vaganay C, Puissant A, Lengline E, Mooney N, et al. Endothelial cells: major players in acute myeloid leukaemia. *Blood Rev*. 2022;54:100932. <https://doi.org/10.1016/j.blre.2022.100932> PMID: [35148910](https://pubmed.ncbi.nlm.nih.gov/35148910/)
37. Zhu S, Yu Y, Qu M, Qiu Z, Zhang H, Miao C, et al. Neutrophil extracellular traps contribute to immunothrombosis formation via the STING pathway in sepsis-associated lung injury. *Cell Death Discov*. 2023;9(1):315. <https://doi.org/10.1038/s41420-023-01614-8> PMID: [37626060](https://pubmed.ncbi.nlm.nih.gov/37626060/)
38. Castanheira FVS, Kubes P. Neutrophils during SARS-CoV-2 infection: Friend or foe? *Immunol Rev*. 2023;314(1):399–412. <https://doi.org/10.1111/imr.13175> PMID: [36440642](https://pubmed.ncbi.nlm.nih.gov/36440642/)
39. Nong Y, Wei X, Lu J, Yu D. The prognostic value of postoperative platelet levels in elderly patients after valve replacement surgery: a retrospective cohort study. *BMC Cardiovasc Disord*. 2024;24(1):379. <https://doi.org/10.1186/s12872-024-04041-4> PMID: [39034415](https://pubmed.ncbi.nlm.nih.gov/39034415/)

40. Arabi S, Almahayni AO, Alomair AA, Masuadi EM, Damlaj M, Al-Dorzi HM. Prevalence, Risk Factors, and Outcomes of Platelet Transfusion Refractoriness in Critically Ill Patients: A Retrospective Cohort Study. *Crit Care Res Pract.* 2021;2021:5589768. <https://doi.org/10.1155/2021/5589768> PMID: [34603795](https://pubmed.ncbi.nlm.nih.gov/34603795/)
41. Schupp T, Rusnak J, Forner J, Dudda J, Bertsch T, Behnes M, et al. Platelet Count During Course of Cardiogenic Shock. *ASAIO J.* 2024;70(1):44–52. <https://doi.org/10.1097/MAT.0000000000002066> PMID: [37831815](https://pubmed.ncbi.nlm.nih.gov/37831815/)
42. Kocayigit H, Özmen Süner K, Tomak Y, Demir G, Kocayigit İ, Yaylacı S, et al. Characteristics and outcomes of critically ill patients with covid-19 in Sakarya, Turkey: a single centre cohort study. *Turk J Med Sci.* 2021;51(2):440–7. <https://doi.org/10.3906/sag-2005-57> PMID: [33185365](https://pubmed.ncbi.nlm.nih.gov/33185365/)
43. Vardon-Bounes F, Garcia C, Piton A, Series J, Gratacap M-P, Poëtte M, et al. Evolution of platelet activation parameters during septic shock in intensive care unit. *Platelets.* 2022;33(6):918–25. <https://doi.org/10.1080/09537104.2021.2007873> PMID: [34915822](https://pubmed.ncbi.nlm.nih.gov/34915822/)
44. Schupp T, Weidner K, Rusnak J, Jawhar S, Forner J, Dulatahu F, et al. Diagnostic and prognostic role of platelets in patients with sepsis and septic shock. *Platelets.* 2023;34(1):2131753. <https://doi.org/10.1080/09537104.2022.2131753> PMID: [36484263](https://pubmed.ncbi.nlm.nih.gov/36484263/)
45. Gombert A, Barbati M, Kotelis D, Simon T-P, Breuer T, Hartmann O, et al. In-hospital mortality and organ failure after open and endovascular thoraco-abdominal aortic surgery can be predicted by increased levels of circulating dipeptidyl peptidase 3. *Eur J Cardiothorac Surg.* 2021;59(4):750–7. <https://doi.org/10.1093/ejcts/ezaa413> PMID: [33236058](https://pubmed.ncbi.nlm.nih.gov/33236058/)
46. Shukla K, Surti J, Dubey G, Mishra A, Gajjar T, Jain I, et al. Measures to improve in-hospital outcomes of patients undergoing surgical repair for anomalous origin of left coronary artery from pulmonary artery. *Ann Card Anaesth.* 2022;25(4):472–8. [https://doi.org/10.4103/aca.aca\\_50\\_21](https://doi.org/10.4103/aca.aca_50_21) PMID: [36254913](https://pubmed.ncbi.nlm.nih.gov/36254913/)
